# Supplementary material for: Binding of the transcription factor Atf1 to promoters serves as a barrier to phase nucleosome arrays and avoid cryptic transcription
Source: PubMed Central journal article supplement (PMC4176342; doi:10.1093/nar/gku704), 2014-08-13
Supplement: supp_gku704_nar-00605-m-2014-File006.pdf [file supp_gku704_nar-00605-m-2014-File006.pdf]

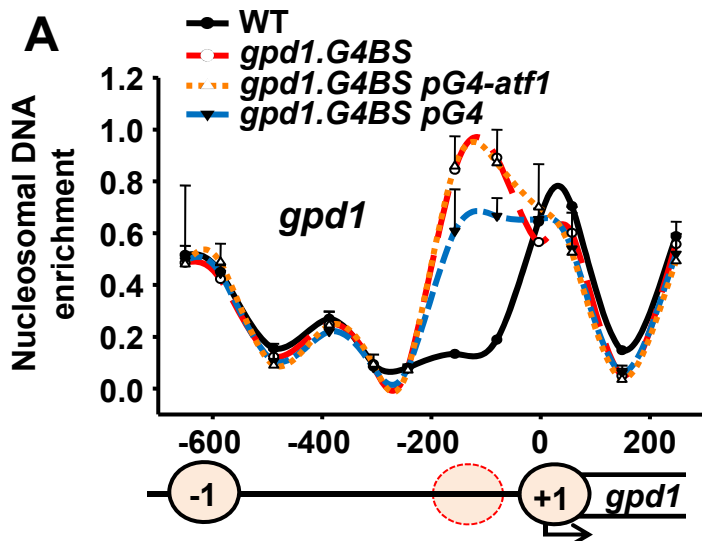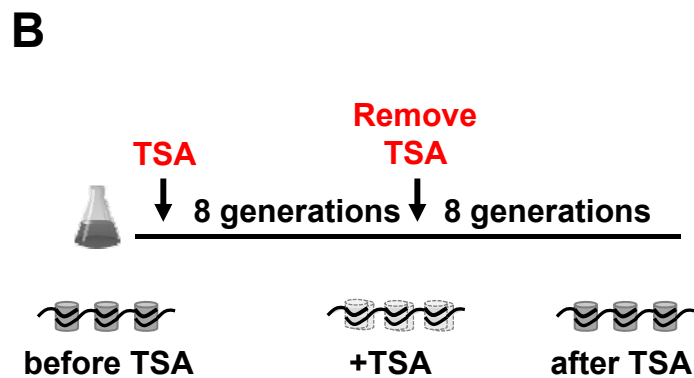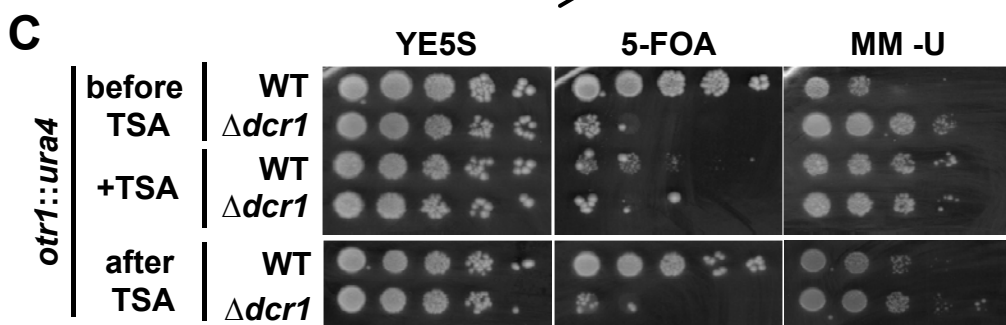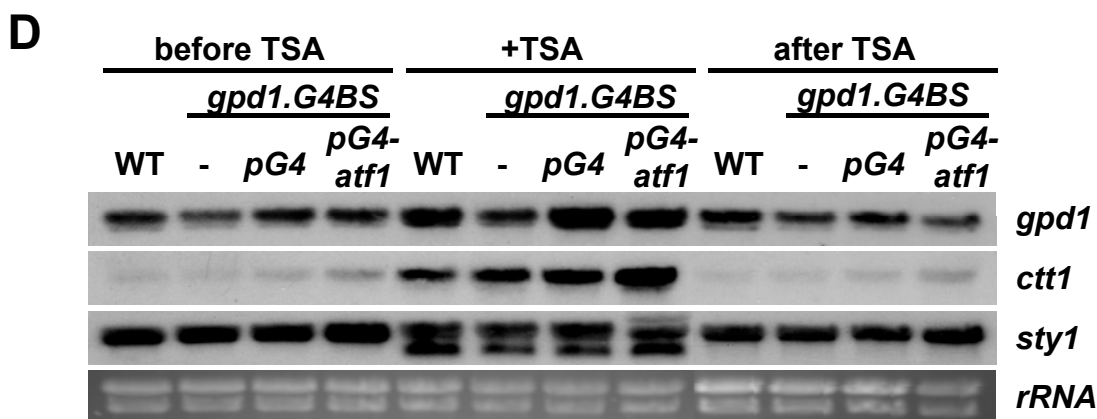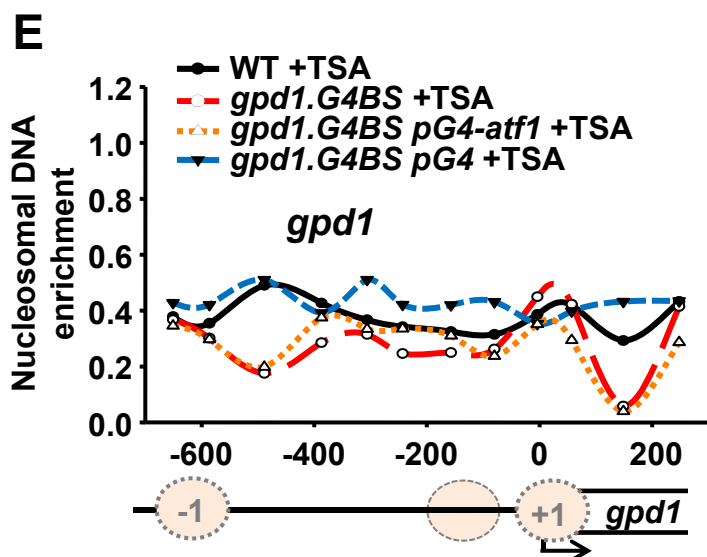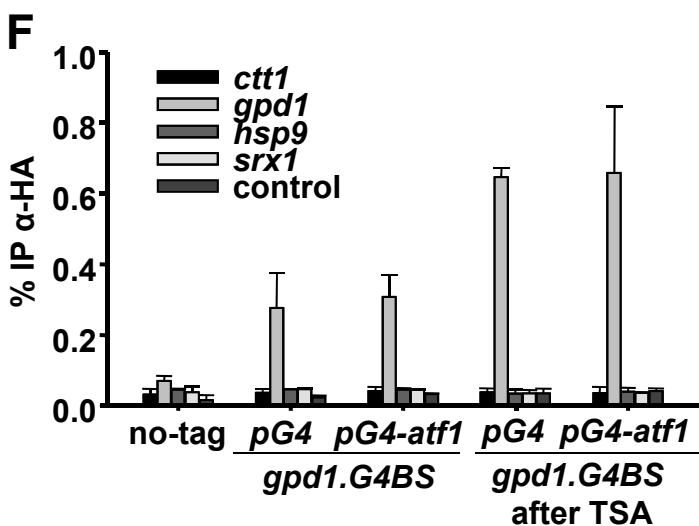

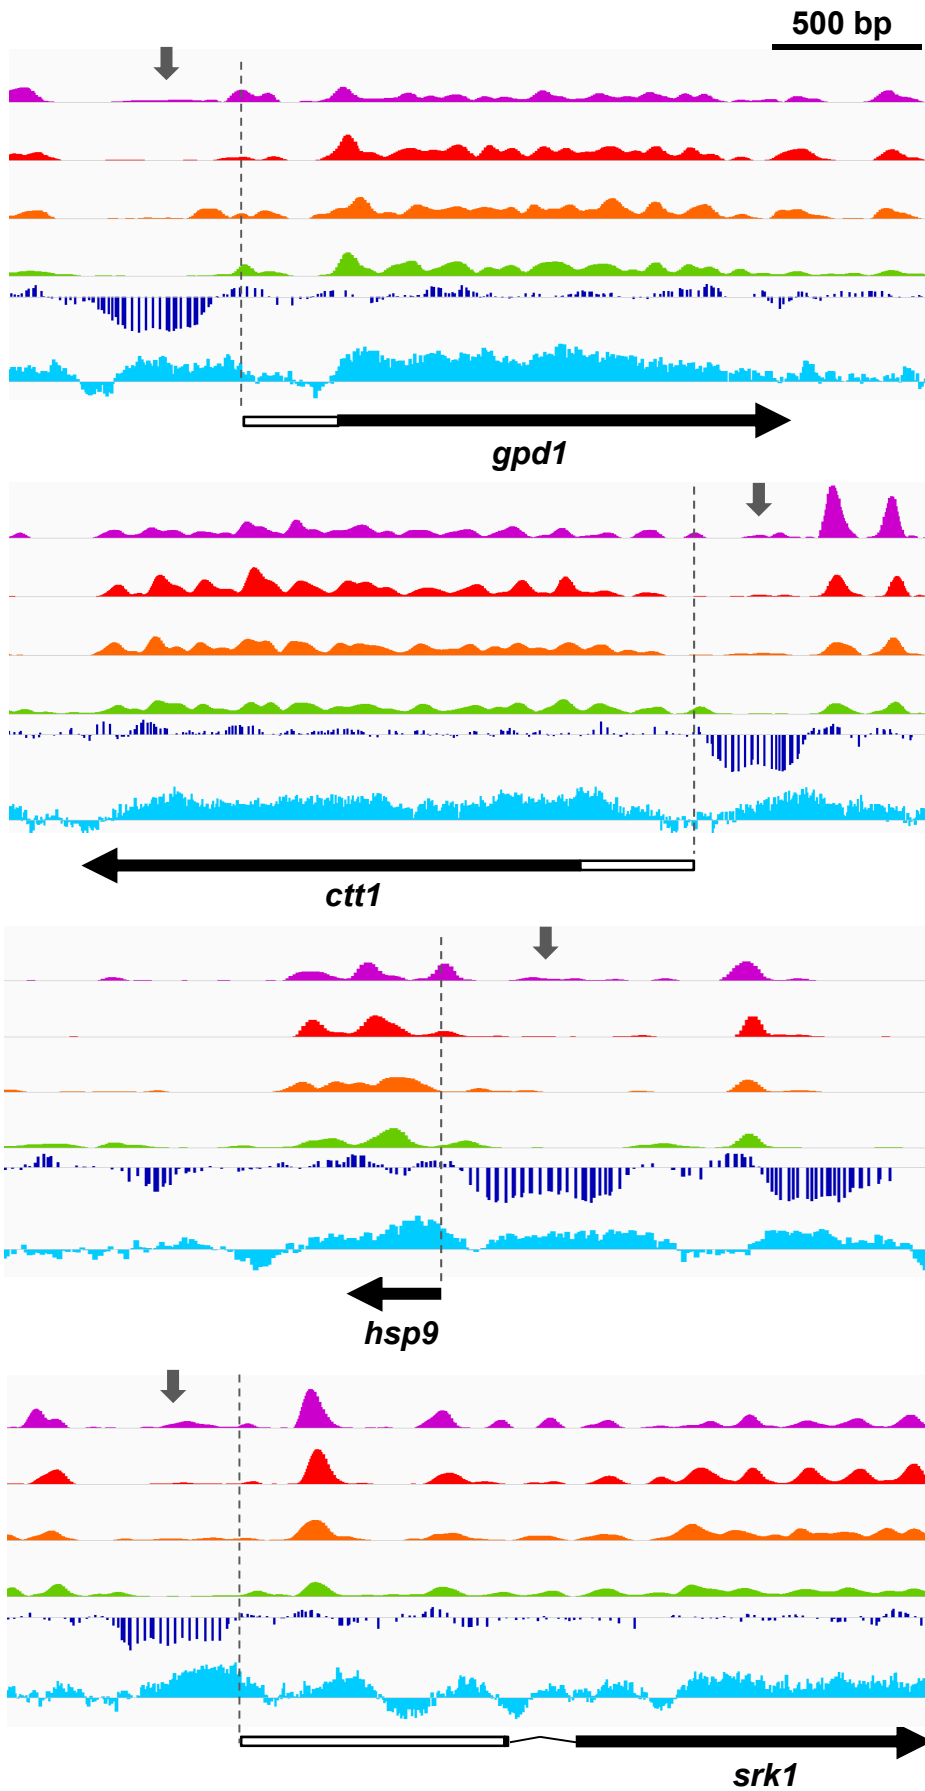

Shim *et al.*  
 wt  
 $\Delta atf1$   
 $\Delta atf1$  pHA-bZIP  
 Lantermann *et al.*  
 Kaplan *et al.*

our data

Shim *et al.*  
 wt  
 $\Delta atf1$   
 $\Delta atf1$  pHA-bZIP  
 Lantermann *et al.*  
 Kaplan *et al.*

our data

Shim *et al.*  
 wt  
 $\Delta atf1$   
 $\Delta atf1$  pHA-bZIP  
 Lantermann *et al.*  
 Kaplan *et al.*

our data

Shim *et al.*  
 wt  
 $\Delta atf1$   
 $\Delta atf1$  pHA-bZIP  
 Lantermann *et al.*  
 Kaplan *et al.*

our data

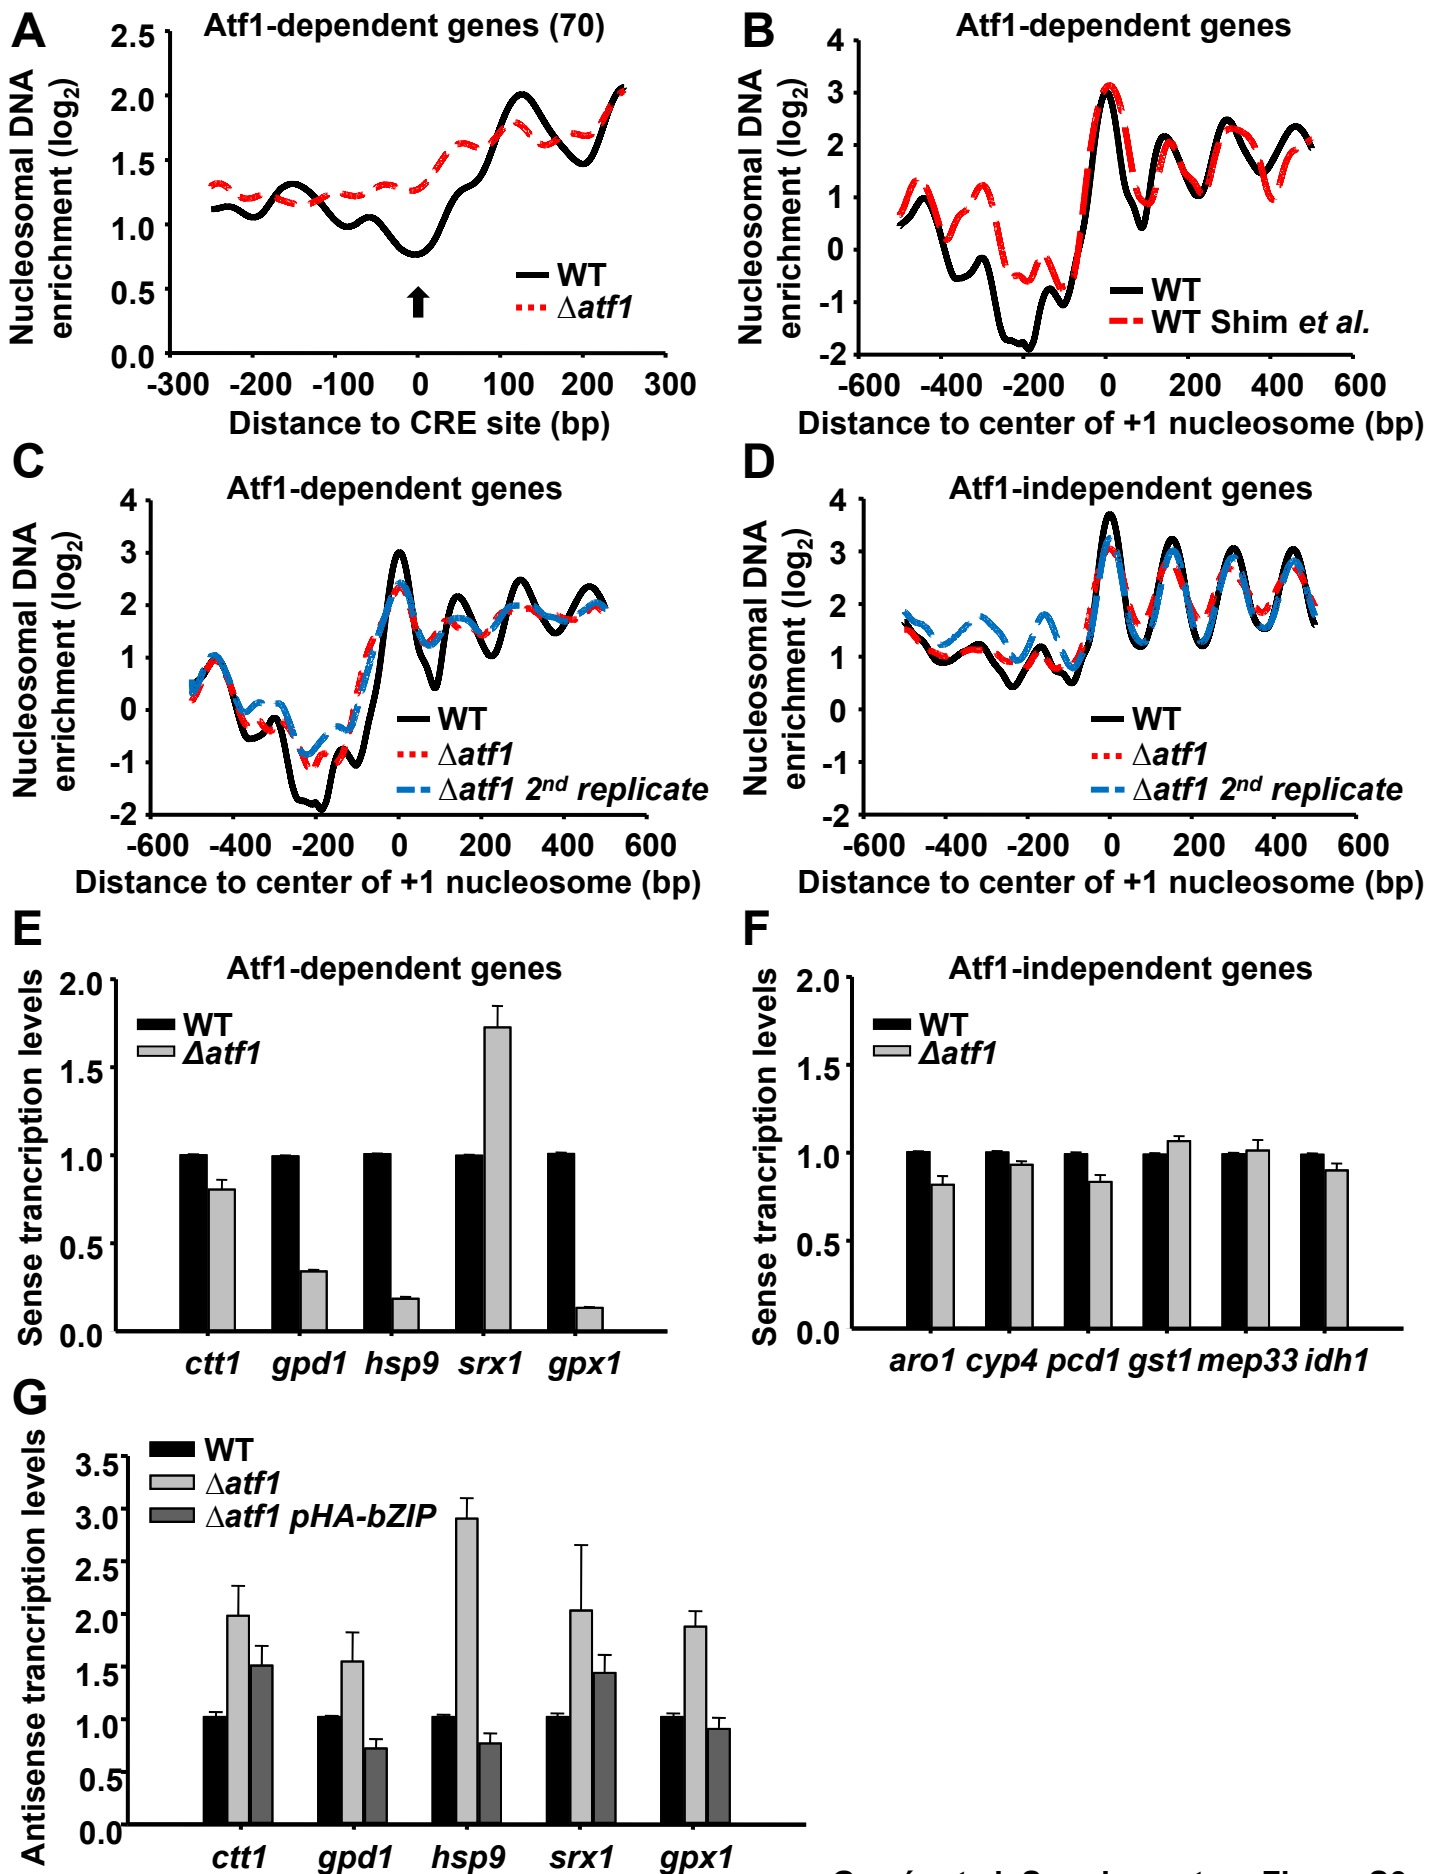

## SUPPLEMENTARY FIGURE LEGENDS

**Supplementary Figure S1** Trichostatin A (TSA) treatment improves Gal4 and Gal4-Atf1<sup>1-395</sup> binding to *gpd1.G4BS* promoter. **(A)** Mono-nucleosomes were isolated from cultures of strains 972 (WT), EP255 (*gpd1.G4BS*), EP286 (*gpd1.G4BS pGal4*) and EP287.ΔbZIP (*gpd1.G4BS pG4-Atf1*), and nucleosome scanning performed as described in Figure 1B. Error bars (SEM) were calculated from biological duplicates. **(B)** Schematic representation of TSA treatment for eight generations to relax chromatin, then the drug was washed out to allow nucleosome repositioning *de novo* for other eight generations. **(C)** TSA treatment alleviates centromeric silencing which is re-established after TSA withdrawal. Cultures of strains DG21 (*otr1::ura4* WT) and DG690 (*otr1::ura4 Δdcr1*) before (before TSA), during (+ TSA), or after (after TSA) TSA withdrawal, were serially diluted and spotted onto rich media plates (YE5S), rich media plates with 5-fluoroorotic acid (5-FOA) or minimal media plates without uracil (MM -U). **(D)** TSA treatment alters expression of the *gpd1*, *ctt1* and *sty1* genes. RNA from strains as in (A) before, during (+ TSA) and after TSA treatment was analyzed by Northern blot with probes for *gpd1*, *ctt1* and *sty1*. *rRNA* is shown as loading control. **(E)** Nucleosomes are loosely positioned in cells treated with TSA. Mono-nucleosomes were isolated from cultures of strains as in (A) treated with TSA for eight generations. Nucleosome scanning was performed as described in Figure 1B. **(F)** Gal4 binding domain and Gal4-Atf1<sup>1-395</sup> physically bind to *gpd1.G4BS*. ChIP analysis of strains 972 (no-tag), EP286 (*gpd1.G4BS pGal4*) and EP287.ΔbZIP (*gpd1.G4BS pG4-Atf1*), before or after TSA treatment, were performed and analyzed as described in Figure 3E.

**Supplementary Figure S2** NDRs at stress promoters are not predicted by DNA sequence. View of nucleosome maps at the *gpd1*, *ctt1*, *hsp9* and *srk1* genes, comparing data obtained by MNase-seq by Shim *et al.* [ref. (27) in the main text] (pink) or in this study (WT: red, Δ*atf1*: orange, Δ*atf1 pHA-bZIP*: green), by MNase-tilling microarray [ref. (11) in the main text] (dark blue) or predicted by DNA sequence as proposed by Kaplan *et al.* [ref. (6) in the main text] (light blue). NDRs at promoters of these stress genes are indicated with vertical arrows. The transcriptional start sites for each gene according to Lantermann *et al.* [ref. (11) in the main text] are indicated with dashed lines.

**Supplementary Figure S3** Binding of only the bZIP domain of Atf1 fully restores nucleosome phasing and normal antisense transcription levels at stress genes. **(A)** Composite plot of relative nucleosome occupancy for strains 972 (WT) and MS98 (Δ*atf1*). Seventy stress genes (Supplementary Table S4 and S5) were aligned at their CRE sites and the average of their log<sub>2</sub> nucleosome occupancy was plotted. **(B)** Composite plots of relative nucleosome occupancy for strain WT (solid black line, our data and red dashed line, data from Shim *et al.*, ref. (27) in the main text). **(C)** Composite plots of relative nucleosome occupancy for strains 972 (WT, solid black line) and MS98 (Δ*atf1*, red dashed line and data from second duplicate, blue dashed line; see Materials and Methods). Thirty five stress genes (Supplementary Table S4) were aligned at their +1 nucleosome and the average of their log<sub>2</sub> nucleosomal DNA enrichment data was plotted. **(D)** Composite plot of relative nucleosome occupancy for strains as in (C), but for fifty Atf1-independent genes (Supplementary Table S6). **(E, F)** The expression levels of sense transcripts of Atf1-dependent (*ctt1*, *gpd1*, *hsp9*, *srx1* and *gpx1*; **E**) and -independent (*aro1*, *cyp4*, *pcd1*, *gst1*, *mep33* and *idh1*; **F**) genes were analyzed by RT-qPCR. **(G)** The expression levels of antisense transcripts of Atf1-dependent (*ctt1*, *gpd1*, *hsp9*, *srx1* and *gpx1*) genes were analyzed by reverse transcription-qPCR. The graphs show the amount of transcripts of each gene relative to that in the WT strain. Error bars (SEM) were calculated from six biological replicates (**E, F**) or triplicates (**G**).

**Supplementary Table S1. Genotypes of strains used in this study**

| <b>Strain</b> | <b>Genotype</b>                                                                                   | <b>Origin</b>          |
|---------------|---------------------------------------------------------------------------------------------------|------------------------|
| 972           | <i>h<sup>-</sup></i>                                                                              | (33)                   |
| MS98          | <i>h<sup>-</sup> atf1::natMX6</i>                                                                 | Ref. (14) in main text |
| EP193         | <i>h<sup>-</sup> atf1::natMX6 leu1-32</i>                                                         | This work              |
| EP203         | <i>h<sup>-</sup> atf1::natMX6 leu1-32 psyt1'::HA-atf1::leu1<sup>+</sup></i>                       | This work              |
| EP203.bZIP    | <i>h<sup>-</sup> atf1::natMX6 leu1-32 psyt1'::HA-atf1<sup>bZIP</sup>::leu1<sup>+</sup></i>        | This work              |
| CH1364        | <i>h<sup>-</sup> ura5-294 lys7-2 leu1-32</i>                                                      | Ref. (17) in main text |
| EP184         | <i>h<sup>+</sup> ctt1'.CRE-to-G4BS leu1-32</i>                                                    | This work              |
| EP213         | <i>h<sup>+</sup> ctt1'.CRE-to-G4BS leu1-32 psyt1'::HA-Gal4-FLAG::leu1<sup>+</sup></i>             | This work              |
| EP212.ΔbZIP   | <i>h<sup>+</sup> ctt1'.CRE-to-G4BS leu1-32 psyt1':: Gal4-FLAG-HA-atf1.ΔbZIP::leu1<sup>+</sup></i> | This work              |
| EP255         | <i>h<sup>+</sup> gpd1'.CRE-to-G4BS leu1-32</i>                                                    | This work              |
| EP286         | <i>h<sup>+</sup> gpd1'.CRE-to-G4BS leu1-32 psyt1'::HA-Gal4-FLAG::leu1<sup>+</sup></i>             | This work              |
| EP287.ΔbZIP   | <i>h<sup>+</sup> gpd1'.CRE-to-G4BS leu1-32 psyt1':: Gal4-FLAG-HA-atf1.ΔbZIP::leu1<sup>+</sup></i> | This work              |
| EP110         | <i>h<sup>-</sup> hrp3::kanMX6</i>                                                                 | This work              |
| IV69          | <i>h<sup>-</sup> hrp1::kanMX6</i>                                                                 | This work              |
| DG21          | <i>h- otr1R(SphI)::ura4 ura4-DS/E leu1-32 his7-366 ade6-M216</i>                                  | (34)                   |
| DG690         | <i>h- dcr1::kanMX6 otr1R(SphI)::ura4 ura4-DS/E ade6-M210 leu1-32 his7-366</i>                     | (34)                   |

**Supplementary Table S2. Primers used in nucleosome-scanning assays**

| <b>Gene</b>       | <b>Sequence</b>           | <b>Direction</b> | <b>Position from TSS</b> |
|-------------------|---------------------------|------------------|--------------------------|
| <i>ctt1</i>       | ACTTCCCCAGGAAACACACT      | Forward          | -495                     |
| <i>ctt1</i>       | AGCTAGACTTTTCAGTCGCAA     | Reverse          | -395                     |
| <i>ctt1</i>       | GCACAAGTTTGCGACTGAAA      | Forward          | -426                     |
| <i>ctt1</i>       | GACACAGACGCTGACATGAAA     | Reverse          | -328                     |
| <i>ctt1</i>       | TTTCATGTCAGCGTCTGTGTC     | Forward          | -349                     |
| <i>ctt1</i>       | GCCATATCAAATCTCCCAACA     | Reverse          | -247                     |
| <i>ctt1</i>       | TAGCGATGGTGTGGGAGAT       | Forward          | -277                     |
| <i>ctt1</i>       | AGCCTATCGTAGTCGCCAAA      | Reverse          | -181                     |
| <i>ctt1 (CRE)</i> | TGGCGACTACGATAGGCTGT      | Forward          | -199                     |
| <i>ctt1 (CRE)</i> | CCGAGATTCCATTGGCTTAG      | Reverse          | -105                     |
| <i>ctt1</i>       | GGCTCACTAAGCCAATGGAA      | Forward          | -131                     |
| <i>ctt1</i>       | ATTGTCTGGTGTAGAATTACCAACG | Reverse          | -39                      |
| <i>ctt1</i>       | GCCATTTGCGTTGGTAAGAG      | Forward          | -106                     |
| <i>ctt1</i>       | TGAAAAGCTGTATATTCAAGCAAC  | Reverse          | +5                       |
| <i>ctt1</i>       | TGCTTGAATATACAGCTTTTCACG  | Forward          | -17                      |
| <i>ctt1</i>       | TTCGATATTCGAACAAGGGAAT    | Reverse          | +92                      |
| <i>ctt1</i>       | GTAATTCCTTGTTTGAATATCG    | Forward          | +67                      |
| <i>ctt1</i>       | GAGGGGAAAAAAAAAAGACAGTC   | Reverse          | +191                     |
| <i>ctt1</i>       | TTTTTCCCCTCCTAACTCTTCA    | Forward          | +180                     |
| <i>ctt1</i>       | GTTGAACGACGAGCAAATGA      | Reverse          | +281                     |
| <i>ctt1</i>       | AATCATTTGCTCGTCGTTCA      | Forward          | +259                     |
| <i>ctt1</i>       | TCGAGTTCATTTGCTGATG       | Reverse          | +370                     |
| <i>ctt1</i>       | TCAGCGAAATGAACTCGAAA      | Forward          | +352                     |
| <i>ctt1</i>       | AGGACCTCCCTTACCCACAC      | Reverse          | +462                     |
| <i>ctt1</i>       | GTGGGTAAGGGAGGTCCTGT      | Forward          | +444                     |
| <i>ctt1</i>       | ACGACACGTTTCAGGAATACG     | Reverse          | +536                     |
| <i>ctt1</i>       | CGTCTTTCAACACTTTGATCG     | Forward          | +491                     |
| <i>ctt1</i>       | GTAATGTCGTCGGTGCATTC      | Reverse          | +590                     |
| <i>ctt1</i>       | TTCCGGTGCTTTTGGTGAAT      | Forward          | +548                     |
| <i>ctt1</i>       | CGAGCAACCATAGGGGTTTT      | Reverse          | +650                     |
| <i>ctt1</i>       | TTGGTAAGAAAACCCCTATGGT    | Forward          | +622                     |
| <i>ctt1</i>       | ACTTTAATGCGAACCCACGA      | Reverse          | +721                     |
| <i>ctt1</i>       | CTCGTGGGTTTCGCATTA        | Forward          | +700                     |
| <i>ctt1</i>       | GAATTTAGCGGGATCACGAA      | Reverse          | +798                     |
| <i>gpd1</i>       | TCTCTAAGCCGCGTTTTGTT      | Forward          | -700                     |
| <i>gpd1</i>       | CTATACCATCTAGGGCCATGC     | Reverse          | -601                     |
| <i>gpd1</i>       | TTCTTTAGGAAAGGGCATGG      | Forward          | -636                     |
| <i>gpd1</i>       | TCCTTTACATCCTAGCACTCTTT   | Reverse          | -536                     |
| <i>gpd1</i>       | GAGTGCTAGGATGTAAAGGA      | Forward          | -556                     |
| <i>gpd1</i>       | GCAATGAGAAGGAGAAGCAA      | Reverse          | -421                     |
| <i>gpd1</i>       | TTCTCCTTCTCATTGCCCTTA     | Forward          | -423                     |
| <i>gpd1</i>       | GATGATAGTTGCGACGAGGA      | Reverse          | -337                     |
| <i>gpd1</i>       | CCTCGTCGCAACTATCATCC      | Forward          | -356                     |
| <i>gpd1</i>       | TTCGCGATACGCTTTGATAA      | Reverse          | -255                     |
| <i>gpd1</i>       | CGCTTCGCAGTTTGTCA         | Forward          | -292                     |

|                      |                         |         |       |
|----------------------|-------------------------|---------|-------|
| <i>gpd1</i>          | TCCGAAGCAAAGAGGAAAAA    | Reverse | -194  |
| <i>gpd1</i>          | CCTCTTTGCTTCGGACCTTT    | Forward | -209  |
| <i>gpd1</i>          | ACGCCATAGCAGCCGTACCA    | Reverse | -96   |
| <i>gpd1 (CRE)</i>    | CTTTGGGTTGACCAAGTGTAG   | Forward | -106  |
| <i>gpd1 (CRE)</i>    | AAAACACTTCAACGGTGTGG    | Reverse | -31   |
| <i>gpd1</i>          | CCAACACCGTTGAAGTGTTT    | Forward | -52   |
| <i>gpd1</i>          | CGAGACAGATCTATTCCAAGCA  | Reverse | +45   |
| <i>gpd1</i>          | CTTGTCACGAATCTGCTTGG    | Forward | +10   |
| <i>gpd1</i>          | ACACTAACCACTCAAAAATGCAG | Reverse | +105  |
| <i>gpd1</i>          | GAGTGGTTAGTGTTTGTTC     | Forward | +92   |
| <i>gpd1</i>          | CCAGACATTGTGTAGAGAAT    | Reverse | +206  |
| <i>gpd1</i>          | TGTCTGGATATGGTCAACAAGG  | Forward | +199  |
| <i>gpd1</i>          | CCAGTTACCGGAGCCAACTA    | Reverse | +297  |
| <i>gpd1</i>          | GGTGTAGTTGGCTCCGGTAA    | Forward | +273  |
| <i>gpd1</i>          | ACATGCGGACCTTACTTCTGA   | Reverse | +373  |
| <i>gpd1</i>          | TGTGGGTCTTTGAGGAGGAG    | Forward | +370  |
| <i>gpd1</i>          | TGCCGGGTAAGTATTTGACA    | Reverse | +469  |
| <i>gpd1</i>          | CAAATACTTACCCGGCATCG    | Forward | +452  |
| <i>gpd1</i>          | GGAACGACAAAGACAAGGATG   | Reverse | +551  |
| <i>gpd1</i>          | TAGACGTGCCGACATCCTT     | Forward | +518  |
| <i>gpd1</i>          | GAAATACCAACGGCACCAG     | Reverse | +620  |
| <i>gpd1</i>          | GTCTCATTGCCCTGGTG       | Forward | +589  |
| <i>gpd1</i>          | GTTTCTCGCTGATAACCTCAGA  | Reverse | +688  |
| <i>srx1 (CRE)</i>    | TTTCGCTAACATGCTGACAA    | Forward | -146  |
| <i>srx1 (CRE)</i>    | GCCCCACAACCTATCTTATCC   | Reverse | -29   |
| <i>hsp9 (CRE)</i>    | CCTTGGATCGCAGTTTTCTC    | Forward | -174  |
| <i>hsp9(CRE)</i>     | CTTGTCCAATTGCTCATGTCA   | Reverse | -81   |
| <i>mei2(control)</i> | CCAAAGAAGCAGCATTCAA     | Forward | +2527 |
| <i>mei2(control)</i> | GAACAGAACCTCCCTGCATA    | Reverse | +2634 |

---

**Supplementary Table S3. Primers used in strand-specific RT-qPCR**

| <b>Gene</b>  | <b>Sequence</b>       | <b>Direction</b> | <b>Position from ATG</b> | <b>Position from TSS</b> |
|--------------|-----------------------|------------------|--------------------------|--------------------------|
| <i>ctt1</i>  | CTCGTGTGGGTAAGGGAGGT  | Forward          | +80                      | +440                     |
| <i>ctt1</i>  | ATGGACGACACGTTTCAGGA  | Reverse          | +180                     | +540                     |
| <i>gpd1</i>  | GCTCCGGTAACTGGGGTACT  | Forward          | +87                      | +285                     |
| <i>gpd1</i>  | CTCCTCAAAGACCCACATGC  | Reverse          | +189                     | +387                     |
| <i>hsp9</i>  | CAAGGCCAAGGAATCCATTA  | Forward          | +81                      | +81                      |
| <i>hsp9</i>  | GAGCCTTGTCATGAGCCTCT  | Reverse          | +181                     | +181                     |
| <i>srx1</i>  | TTCATGCGGTTTGACTTCAG  | Forward          | +141                     | +288                     |
| <i>srx1</i>  | CCCCCAAAGGCCAAAATAATA | Reverse          | +245                     | +392                     |
| <i>gpx1</i>  | CGACTTGGCTCCTAAGGACA  | Forward          | +15                      | +15                      |
| <i>gpx1</i>  | AATCCACATTTGCTCGCTGT  | Reverse          | +113                     | +113                     |
| <i>aro1</i>  | TTAAAGATGCCAAGGCTGAAG | Forward          | +194                     | +194                     |
| <i>aro1</i>  | CAATCTTCAATTTCCGCTTTC | Reverse          | +290                     | +290                     |
| <i>cyp4</i>  | CGGAGAAAAGGGATTTGGAT  | Forward          | +192                     | +222                     |
| <i>cyp4</i>  | CCAGTACCATCACCCCTTCGT | Reverse          | +290                     | +320                     |
| <i>pcd1</i>  | AGCAGTCAATCGCACCATGT  | Forward          | +169                     | +299                     |
| <i>pcd1</i>  | CCATGGTCAAATCTCCGTTT  | Reverse          | +265                     | +395                     |
| <i>gst1</i>  | ATCTTTGCCTCGTGACCATC  | Forward          | +264                     | +264                     |
| <i>gst1</i>  | CTAAACCATCCAGCCTGTCC  | Reverse          | +365                     | +365                     |
| <i>mep33</i> | CGGTCTACCAAGGTTCAAGC  | Forward          | +109                     | +453                     |
| <i>mep33</i> | GTTTGCGAAGAGCTTCCTGA  | Reverse          | +205                     | +554                     |
| <i>idh1</i>  | AAATCCTCAGCTTTTCAACCA | Forward          | +22                      | +82                      |
| <i>idh1</i>  | CTGTCACTGCATTGCTCGTT  | Reverse          | +121                     | +181                     |



**Supplementary Table S4. List of the top 35 genes up-regulated in response to 0.5 mM H<sub>2</sub>O<sub>2</sub> (35)**

| Gene names                       | Chromosome | Strand | ORF left position | ORF right position | nucleosome +1 | CRE site |
|----------------------------------|------------|--------|-------------------|--------------------|---------------|----------|
| SPBC660.05                       | II         | +      | 202536            | 202967             | 202302        | 202209   |
| SPAC23H3.15c:SPAC25H1.01c        | I          | -      | 2523629           | 2524606            | 2524880       | 2524932  |
| SPBC24C6.09c                     | II         | -      | 2335262           | 2337739            | 2337715       | 2337818  |
| SPAC4H3.03c                      | I          | -      | 3826640           | 3828589            | 3829160       | 3829187  |
| pyp2:SPAC19D5.01                 | I          | +      | 5202823           | 5204958            | 5202100       | 5201878  |
| SPCC757.03c                      | III        | -      | 47741             | 48475              | 48783         | 48644    |
| ish1:SPBC365.12c                 | II         | -      | 2516249           | 2518303            | 2518785       | 258840   |
| SPAC2H10.01                      | I          | +      | 5274171           | 5275613            | 5273050       | 5274171  |
| SPAC22F8.05                      | I          | +      | 4792308           | 4794983            | 4791890       | 4791800  |
| SPBC725.03                       | II         | +      | 1207040           | 1207813            | 1207100       | 1206971  |
| oca2:SPCC1020.10                 | III        | -      | 758901            | 760853             | 762700        | 762814   |
| srx1:SPBC106.02c                 | II         | -      | 376462            | 376836             | 376800        | 377115   |
| SPAC23G3.13c:SPAC22H12.01c:mug35 | I          | -      | 893719            | 894423             | 894475        | 895018   |
| SPBC725.10                       | II         | +      | 1224974           | 1225462            | 1224920       | 1224499  |
| ctt1:cta1:SPCC757.07c            | III        | -      | 56927             | 58465              | 58665         | 58893    |
| SPCC417.13:SPCC191.01            | III        | +      | 1706461           | 1706997            | 1705900       | 1705993  |
| rsv2:SPBC1105.14                 | II         | +      | 3532931           | 3534844            | 3533050       | 3532881  |
| SPCP31B10.06:mug190              | III        | +      | 533322            | 536888             | 532620        | 532574   |
| SPBC1105.13c                     | II         | -      | 3531760           | 3532188            | 3532530       | 3532889  |
| SPAC32A11.02c                    | I          | -      | 2447948           | 2450503            | 2451032       | 2451064  |
| SPBC11C11.06c                    | II         | -      | 3359360           | 3359896            | 3359940       | 3359938  |
| SPBC21C3.19                      | II         | +      | 3830167           | 3830487            | 3830083       | 3829924  |
| srk1:mkp1:SPCC1322.08            | III        | +      | 1302900           | 1304865            | 1302200       | 1301880  |
| SPAC16A10.01                     | I          | +      | 3077676           | 3080168            | 3080055       | 3077622  |
| SPAC57A7.02c:SPAC167.06c:mug143  | I          | +      | 1550133           | 1550498            | 1550118       | 1550036  |
| SPCC338.12                       | III        | -      | 1355276           | 1355509            | 1355640       | 1355689  |
| ssa1:SPAC13G7.02c                | I          | -      | 2295819           | 2297753            | 2297750       | 2298314  |
| SPBC428.10                       | II         | +      | 461306            | 463561             | 460945        | 460733   |
| SPCC4G3.03                       | III        | -      | 466796            | 467839             | 467860        | 468099   |
| SPAC57A7.05                      | I          | -      | 1534588           | 1538601            | 1540125       | 1540610  |
| hsp16:SPBC3E7.02c                | II         | -      | 2660490           | 2660921            | 2661130       | 2661060  |
| SPCC16A11.15c                    | III        | -      | 896182            | 896535             | 896915        | 897141   |
| cgs1:SPAC8C9.03                  | I          | +      | 3643239           | 3644742            | 3643140       | 3642965  |
| ntp1:SPBC660.07                  | II         | +      | 207078            | 209285             | 2069970       | 206512   |
| SPBC16D10.08c                    | II         | -      | 3612359           | 3615076            | 3615254       | 3615709  |

**Supplementary Table S5. List of additional 35 genes with CRE site (36)**

| Gene names         | Chromosome | Strand | ORF left position | ORF right position | CRE site |
|--------------------|------------|--------|-------------------|--------------------|----------|
| SPCC320.03         | III        | -      | 168525            | 165922             | 170909   |
| SPBC1685.13        | II         | +      | 526091            | 526642             | 525443   |
| SPBC32F12.11:tdh1  | II         | +      | 2807637           | 2808647            | 2807395  |
| SPCC1672.02c:sap1  | III        | -      | 562353            | 563117             | 563843   |
| SPAP8A3.04c:hsp9   | I          | -      | 5320399           | 5320605            | 5320739  |
| SPACUNK4.15        | I          | -      | 2881105           | 2881731            | 2882242  |
| SPBC215.05:gpd1    | II         | +      | 4035814           | 4036971            | 4035445  |
| SPCC576.03c:tpx1   | III        | -      | 2085036           | 2085614            | 2085824  |
| SPBC530.10c:anc1   | II         | -      | 811413            | 812381             | 812990   |
| SPBC725.02:mpr1    | II         | +      | 1203757           | 1204644            | 1202995  |
| SPCC736.15         | III        | +      | 349172            | 350227             | 348400   |
| SPBC660.16         | II         | +      | 230368            | 233061             | 230260   |
| SPBC19C2.07:fba1   | II         | +      | 1688367           | 1689443            | 1688177  |
| SPCC576.17c        | III        | -      | 2111638           | 2113390            | 2113775  |
| SPCC553.10         | III        | -      | 283422            | 284471             | 285345   |
| SPCC622.12c        | III        | -      | 1419457           | 1420812            | 1421221  |
| SPAC25B8.12c       | I          | -      | 4177021           | 4177932            | 4178329  |
| SPAC343.12:rds1    | I          | +      | 1668071           | 1669279            | 1667637  |
| SPBC4B4.08:ght2    | II         | +      | 3427572           | 3429167            | 3427029  |
| SPAC26F1.07        | I          | -      | 5170883           | 5171848            | 5172152  |
| SPAC27E2.11c       | I          | -      | 4009573           | 4009818            | 4010000  |
| SPBC14F5.04c:pgk1  | II         | -      | 4158172           | 4159416            | 4159697  |
| SPAC9E9.09c        | I          | -      | 4453560           | 4455071            | 4455851  |
| SPCC13B11.01:adh1  | III        | +      | 1591359           | 1592411            | 1590984  |
| SPCC825.03c:psy1   | III        | -      | 1028292           | 1029146            | 1029369  |
| SPAC9E9.01         | I          | +      | 4434861           | 4435201            | 4434770  |
| SPACUNK4.17        | I          | -      | 2873032           | 2874252            | 2874728  |
| SPBC32F12.03c:gpx1 | II         | -      | 2789071           | 2789547            | 2789652  |
| SPBC16H5.02:pfk1   | II         | -      | 2297466           | 2300294            | 2300620  |
| SPAC26H5.09c       | I          | -      | 4137573           | 4138682            | 4139341  |
| SPBC3H7.02         | II         | -      | 1884365           | 1886998            | 1887836  |
| SPCC1235.01        | III        | +      | 174183            | 176159             | 173785   |
| SPBC19C7.04c       | II         | -      | 2825692           | 2826066            | 2826838  |
| SPAC1751.01c       | I          | -      | 378192            | 380354             | 381580   |
| SPBC17G9.11c:pyr1  | II         | -      | 2190874           | 2194431            | 2194609  |

**Supplementary Table S6. List of 50 genes non-regulated in response to 0.5 mM H<sub>2</sub>O<sub>2</sub> (35)**

| Gene names          | Chromosome | Strand | ORF left position | ORF right position | nucleosome +1 |
|---------------------|------------|--------|-------------------|--------------------|---------------|
| aro1:SPAC1834.02    | I          | +      | 4693771           | 4698492            | 4.694.012     |
| cyp4:SPBP8B7.25     | III        | +      | 3685901           | 3686599            | 3.685.972     |
| SPCC4B3.16          | III        | -      | 1146383           | 1147141            | 1.147.027     |
| SPAC630.09c         | I          | -      | 362769            | 363602             | 363.537       |
| SPAC17G8.05         | I          | +      | 2350327           | 2351019            | 2.350.492     |
| SPBC1198.05         | II         | +      | 181695            | 182303             | 181.707       |
| pcd1:SPAC6G9.05     | I          | +      | 3253513           | 3254370            | 3.801.542     |
| gst1:SPCC191.09c    | III        | -      | 1719325           | 1720014            | 1.720.052     |
| mep33:SPBC28F2.02   | II         | +      | 1574527           | 1575405            | 1.574.392     |
| idh1:SPAC11G7.03    | I          | +      | 3966835           | 3967905            | 3.966.831     |
| SPAC1A6.03c         | I          | -      | 1070061           | 1072127            | 1.072.330     |
| SPBC4C3.06          | II         | -      | 3124204           | 3126701            | 3.126.671     |
| SPCC1442.05c        | III        | -      | 1776594           | 1777127            | 1.777.123     |
| SPAC56F8.07         | I          | +      | 1138566           | 1139117            | 1.138.723     |
| SPBC1685.04         | II         | +      | 502873            | 503850             | 503.973       |
| SPAP14E8.04         | I          | +      | 1926739           | 1927752            | 1.926.777     |
| ppi1:SPBC28F2.03    | II         | +      | 1576329           | 1576817            | 1.576.425     |
| aps2:SPBC685.04c    | II         | -      | 2776485           | 2776916            | 2.777.152     |
| rpc25:SPBC2G5.07c   | II         | -      | 2592258           | 2593170            | 2.593.362     |
| SPAC977.08          | I          | +      | 44704             | 45414              | 44.798        |
| btb3:SPAC13D6.04c   | I          | -      | 2251500           | 2253189            | 2.253.152     |
| cdc17:SPAC20G8.01   | I          | +      | 1387944           | 1390352            | 1.388.024     |
| SPAC10F6.13c        | I          | -      | 1230788           | 1232017            | 1.232.011     |
| SPBC13A2.01c        | II         | -      | 3399336           | 3400073            | 3.400.067     |
| SPAC8F11.09c        | I          | -      | 2868517           | 2869377            | 2.869.391     |
| SPCC63.06           | III        | +      | 845924            | 846919             | 846.027       |
| rga7:SPBC23G7.08c   | II         | -      | 2110807           | 2112894            | 2.112.873     |
| btb2:SPBC25B2.06c   | II         | -      | 2607314           | 2608370            | 2.608.399     |
| trk1:SPAC3F10.02c   | I          | -      | 2818256           | 2820781            | 2.821.073     |
| bgs1:SPBC19G7.05c   | II         | -      | 2351054           | 2356243            | 2.357.041     |
| nfs1:SPBC21D10.11c  | II         | +      | 2422760           | 2424265            | 2.422.913     |
| SPBC19C2.10         | II         | +      | 1695221           | 1696841            | 1.695.336     |
| orb6:SPAC821.12     | I          | +      | 1008439           | 1010160            | 1.008.652     |
| sub1:SPAC16A10.02   | I          | +      | 3081012           | 3081472            | 3.084.073     |
| cog1:SPAC144.15c    | I          | -      | 4683276           | 4685381            | 4.685.340     |
| SPAC7D4.03c         | I          | +      | 2634211           | 2636871            | 2.634.319     |
| meu27:SPCC1259.14c  | III        | -      | 1061985           | 1064195            | 1.064.240     |
| rpl302:SPAPB8E5.06c | I          | -      | 4917825           | 4918991            | 4.918.997     |
| SPCC4G3.13c         | III        | +      | 445404            | 446051             | 445.500       |
| pep3:SPCC790.02     | III        | +      | 2242505           | 2245354            | 2.242.592     |
| rps2802:SPCC285.15c | III        | -      | 1827104           | 1827360            | 1.827.374     |
| cys2:SPBC106.17c    | II         | -      | 411120            | 412634             | 412.666       |
| cox9:SPCC1259.05c   | III        | -      | 1042639           | 1042877            | 1.042.896     |
| SPAC3A11.01         | I          | -      | 3471020           | 3474807            | 3.474.815     |
| rpn502:SPAPB8E5.02c | I          | -      | 4909497           | 4910875            | 4.910.706     |
| exo70:SPBC106.20    | II         | +      | 417319            | 419476             | 419.148       |
| SPCC285.03          | III        | +      | 1797992           | 1799806            | 1.798.235     |
| ptp4:SPBC3D6.05     | II         | +      | 1278358           | 1279373            | 1.278.462     |
| rud3:SPBC119.12     | II         | +      | 740275            | 741480             | 740.373       |
| SPBC1734.03         | II         | +      | 1064200           | 1066401            | 1.064.410     |

## SUPPLEMENTARY REFERENCES

33. Leupold, U. (1970) Genetical methods for *Schizosaccharomyces pombe*. *Methods Cell Physiol.*, **4**, 169-177.
34. Li, F., Goto, D.B., Zaratiegui, M., Tang, X., Martienssen, R. and Cande, W.Z. (2005) Two novel proteins, dos1 and dos2, interact with rik1 to regulate heterochromatic RNA interference and histone modification. *Curr Biol*, **15**, 1448-1457.
35. Chen, D., Wilkinson, C.R., Watt, S., Penkett, C.J., Toone, W.M., Jones, N. and Bahler, J. (2008) Multiple pathways differentially regulate global oxidative stress responses in fission yeast. *Mol Biol Cell*, **19**, 308-317.
36. Eshaghi, M., Lee, J.H., Zhu, L., Poon, S.Y., Li, J., Cho, K.H., Chu, Z., Karuturi, R.K. and Liu, J. (2010) Genomic binding profiling of the fission yeast stress-activated MAPK Sty1 and the bZIP transcriptional activator Atf1 in response to H<sub>2</sub>O<sub>2</sub>. *PLoS One*, **5**, e11620.
